# Supplementary material
Source: publisher figshare collection journal article supplement (https://springernature.figshare.com/ndownloader/files/20104442)

## Additional File 1

### Supplementary result

#### TWS119 with the dose of 10 mg/kg was selected in animal experiment

To select effective dose TWS119, the effect of two dose TWS119 on Wnt/ $\beta$ -catenin pathway and post-stroke neurological function were evaluated using qRT-PCR and Adhesive Removal test at 14 days after stroke. Compared to saline treatment, TWS119 with the dose of 5 mg/kg ( $1.00 \pm 0.08$  versus  $1.33 \pm 0.07$ ,  $P < 0.01$ ) and TWS119 with the dose of 10 mg/kg ( $1.00 \pm 0.08$  versus  $1.43 \pm 0.08$ ,  $P < 0.01$ ) upregulated the mRNA expression of  $\beta$ -catenin in ischemic mice 14 days after stroke (Fig. 1S a). However, only TWS119 with the dose of 10 mg/kg ( $25.33 \pm 3.21$  versus  $13.96 \pm 1.61$ ,  $P < 0.01$ ) significantly improved the neurological function (Fig. 1S b). Consequently, TWS119 at the dose of 10 mg/kg was used in animal experiment.

#### TWS119 activated Wnt/ $\beta$ -catenin pathway by inhibiting GSK-3 $\beta$

To further evaluate the pharmacological effect of TWS119 on Wnt/ $\beta$ -catenin pathway, the expression of  $\beta$ -catenin and GSK-3 $\beta$  were determined by Western blot 14 days after stroke (Fig. 2S a). Compared to vehicle treatment, TWS119 treatment significantly reduced the expression of GSK-3 $\beta$  ( $0.74 \pm 0.08$  versus  $0.37 \pm 0.07$ ,  $P < 0.01$ , shown in Fig. 2S b) and increased the expression of  $\beta$ -catenin ( $1.26 \pm 0.08$  versus  $1.71 \pm 0.16$ ,  $P < 0.05$ , shown in Fig. 2S c) in ischemic mice, suggesting TWS119 activated Wnt/ $\beta$ -catenin pathway by inhibiting GSK-3 $\beta$ .

## **TWS119 improved histological damage in the late stage of stroke**

The cortical width index (CWI) of TWS119-treated mice group was significantly reduced compared to vehicle mice 21 days after stroke ( $0.80 \pm 0.02$  versus  $0.88 \pm 0.02$ ,  $P < 0.05$ , Fig. 2S e), indicating that TWS119 improved histological damage in the late stage of stroke.

## **Supplemental figure legends**

**Fig. 1S TWS119 at the dose of 10 mg/kg was selected in animal experiment. a** TWS119 with the dose of 5 mg/kg and TWS119 with the dose of 10 mg/kg upregulated the mRNA expression of  $\beta$ -catenin ( $n = 8$  per group,  $* P < 0.05$ ,  $** P < 0.01$ ). **b** Neurological functions were evaluated using Adhesive Removal test at day1, 7 and 14 after stroke. TWS119 with the dose of 10 mg/kg significantly improved neurological function at day 14 after stroke ( $n = 8$  per group, TWS119 (10 mg/kg) vs Vehicle,  $^{\#} P < 0.01$ ).

**Fig. 2S TWS119 activated Wnt/ $\beta$ -catenin pathway by inhibiting GSK-3 $\beta$  and improved histological damage. a** Western blot was used to determine the expression of  $\beta$ -catenin and GSK-3 $\beta$  14 days after stroke. **b** and **c** TWS119-treated mice had a lower level of GSK-3 $\beta$  and a higher level  $\beta$ -catenin comparing to vehicle mice ( $n = 6$  per group,  $* P < 0.05$ ,  $** P < 0.01$ ). **d** Histological damage was assessed by quantification of the infarcted cortex cavitation using CWI. **e** TWS119 treatment increased the CWI in ischemic mice comparing to vehicle treatment 21 days after stroke ( $n = 8$  per group,  $* P < 0.05$ ). CWI, Cortical width index.  $CWI = 100\% \times W.lpsi / W.contra$ , W.lpsi means ipsilateral width,

W.contra means contralateral width.

**Figure. 1S**

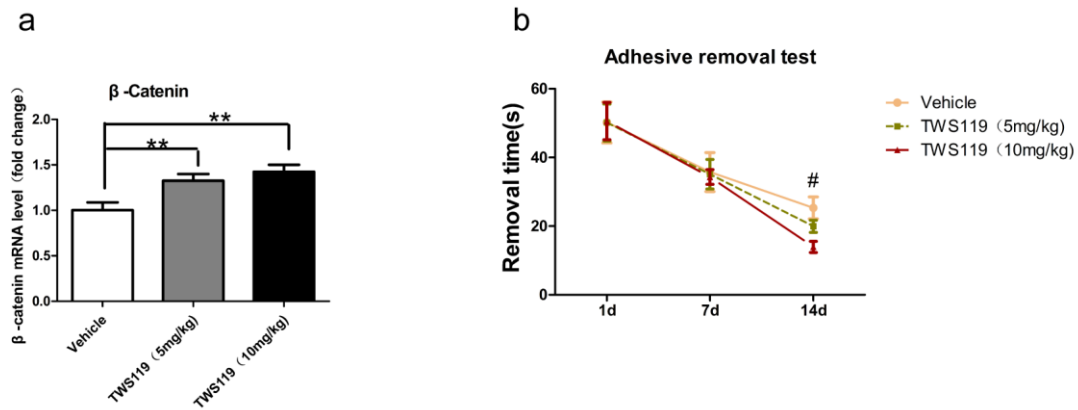

**Figure. 2S**

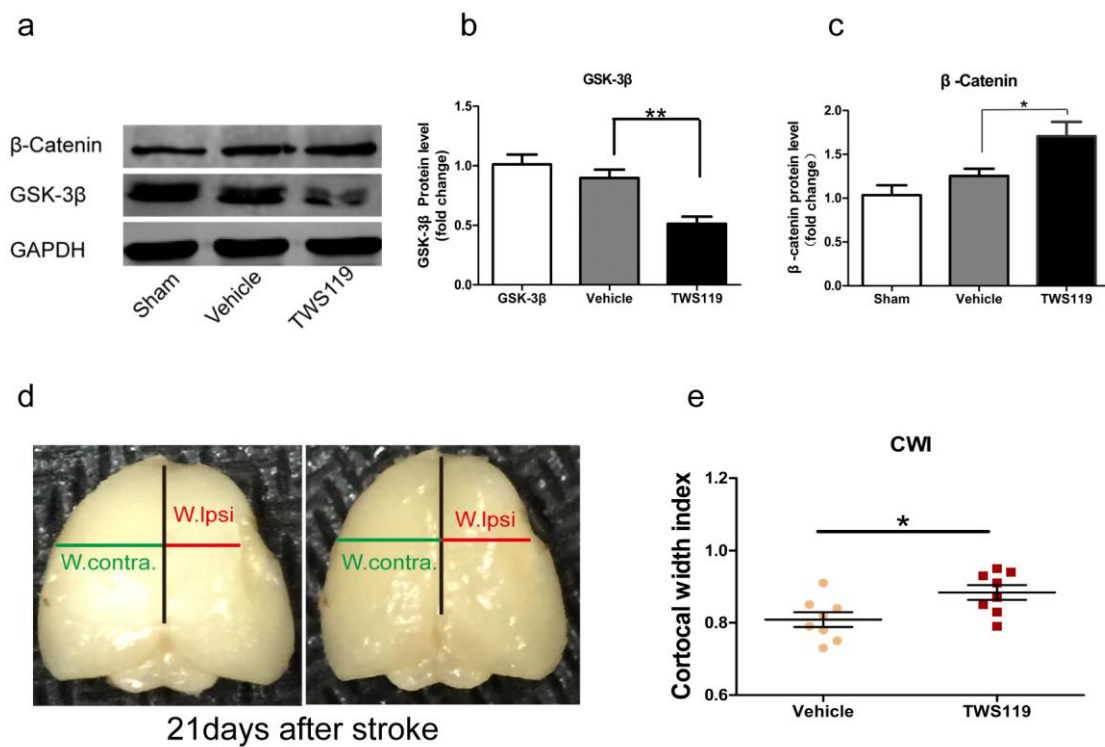

Supplement: Supplementary file [file 20104442]
